# Supplementary material for: Influence of Prior Imaging Information on Diagnostic Accuracy for Focal Skeletal Processes—A Retrospective Analysis of the Consistency between Biopsy-Verified Imaging Diagnoses
Source: MDPI journal article supplement (doi:10.3390/diagnostics12071735), 2022-07-17
Supplement: s1 [file s1]

Table S1 Supplements. Modality sequence

| Modality sequence    | Number of modalities per biopsy |                 |                | Total      |
|----------------------|---------------------------------|-----------------|----------------|------------|
|                      | 2                               | 3               | 4              |            |
| X-Ray/CT             | 25                              |                 |                | 25         |
| X-Ray/CT/MRI         |                                 | 23              |                | 23         |
| X-Ray/CT/MRI/PET-CT  |                                 |                 | 1              | 1          |
| X-Ray/CT/PET-CT      |                                 | 3               |                | 3          |
| X-Ray/CT/PET-CT/MRI  |                                 |                 | 2              | 2          |
| X-Ray/MRI            | 24                              |                 |                | 24         |
| X-Ray/MRI/CT         |                                 | 13              |                | 13         |
| X-Ray/MRI/PET-CT     |                                 | 1               |                | 1          |
| X-Ray/PET-CT         | 3                               |                 |                | 3          |
| X-Ray/PET-CT/MRI     |                                 | 1               |                | 1          |
| CT/MRI               | 39                              |                 |                | 39         |
| CT/MRI/PET-CT        |                                 | 3               |                | 3          |
| CT/MRI/X-Ray         |                                 | 7               |                | 7          |
| CT/PET-CT            | 8                               |                 |                | 8          |
| CT/PET-CT/MRI        |                                 | 2               |                | 2          |
| CT/PET-CT/X-Ray      |                                 | 2               |                | 2          |
| CT/PET-CT/X-Ray/MRI  |                                 |                 | 1              | 1          |
| CT/X-Ray             | 16                              |                 |                | 16         |
| CT/X-Ray/MRI         |                                 | 3               |                | 3          |
| MRI/CT               | 10                              |                 |                | 10         |
| MRI/CT/PET-CT/X-Ray  |                                 |                 | 1              | 1          |
| MRI/CT/X-Ray         |                                 | 1               |                | 1          |
| MRI/CT/ X-Ray/PET-CT |                                 |                 | 1              | 1          |
| MRI/PET-CT           | 3                               |                 |                | 3          |
| MRI/PET-CT/X-Ray     |                                 | 1               |                | 1          |
| MRI/PET-CT/X-Ray/CT  |                                 |                 | 1              | 1          |
| MRI/X-Ray            | 6                               |                 |                | 6          |
| MRI/X-Ray/CT         |                                 | 2               |                | 2          |
| PET-CT/CT            | 3                               |                 |                | 3          |
| PET-CT/CT/MRI        |                                 | 1               |                | 1          |
| PET-CT/MRI           | 4                               |                 |                | 4          |
| PET-CT/MRI/X-Ray     |                                 | 1               |                | 1          |
| PET-CT/X-Ray         | 3                               |                 |                | 3          |
| PET-CT/X-Ray/CT      |                                 | 1               |                | 1          |
| <b>Total</b>         | <b>144 (67%)</b>                | <b>65 (30%)</b> | <b>7 (3 %)</b> | <b>216</b> |
